# Supplementary material
Source: publisher site journal article supplement (https://www.dovepress.com/article/356797)
Supplement: Supplementary file 1 [file get_supplementary_file.php]

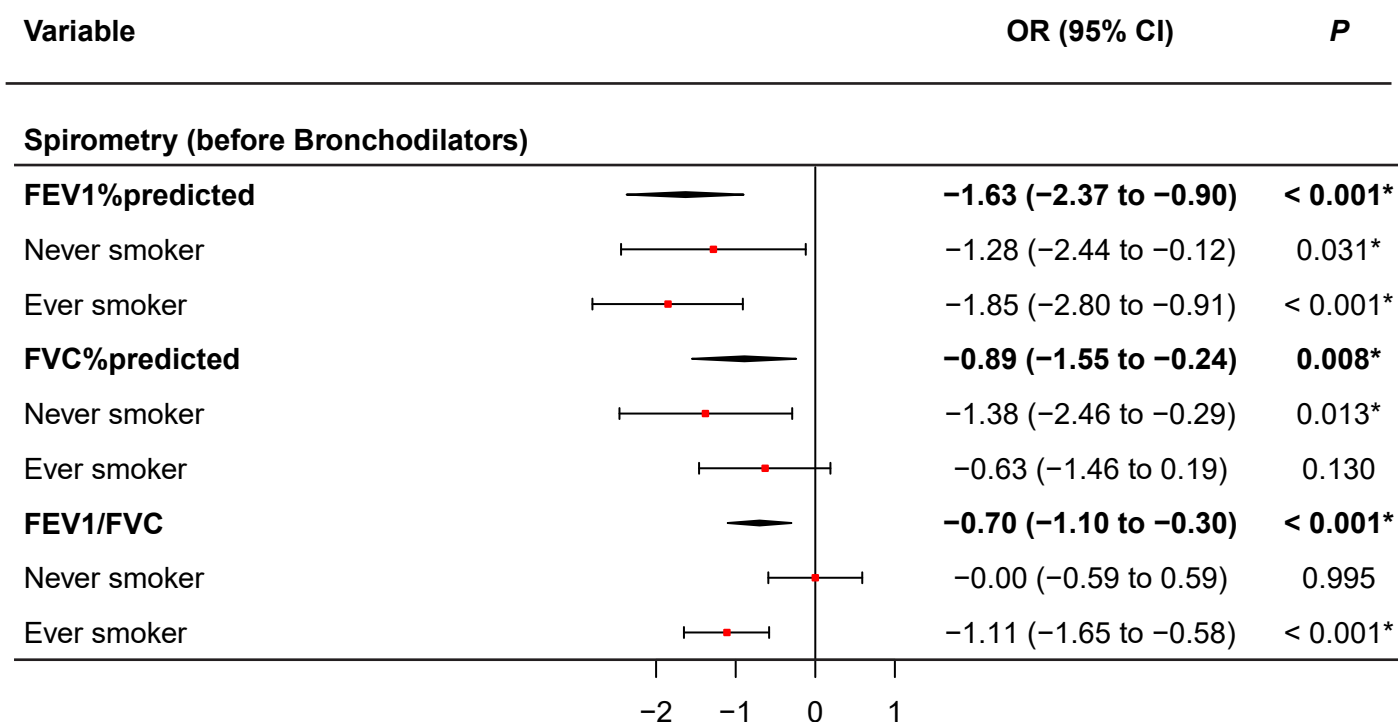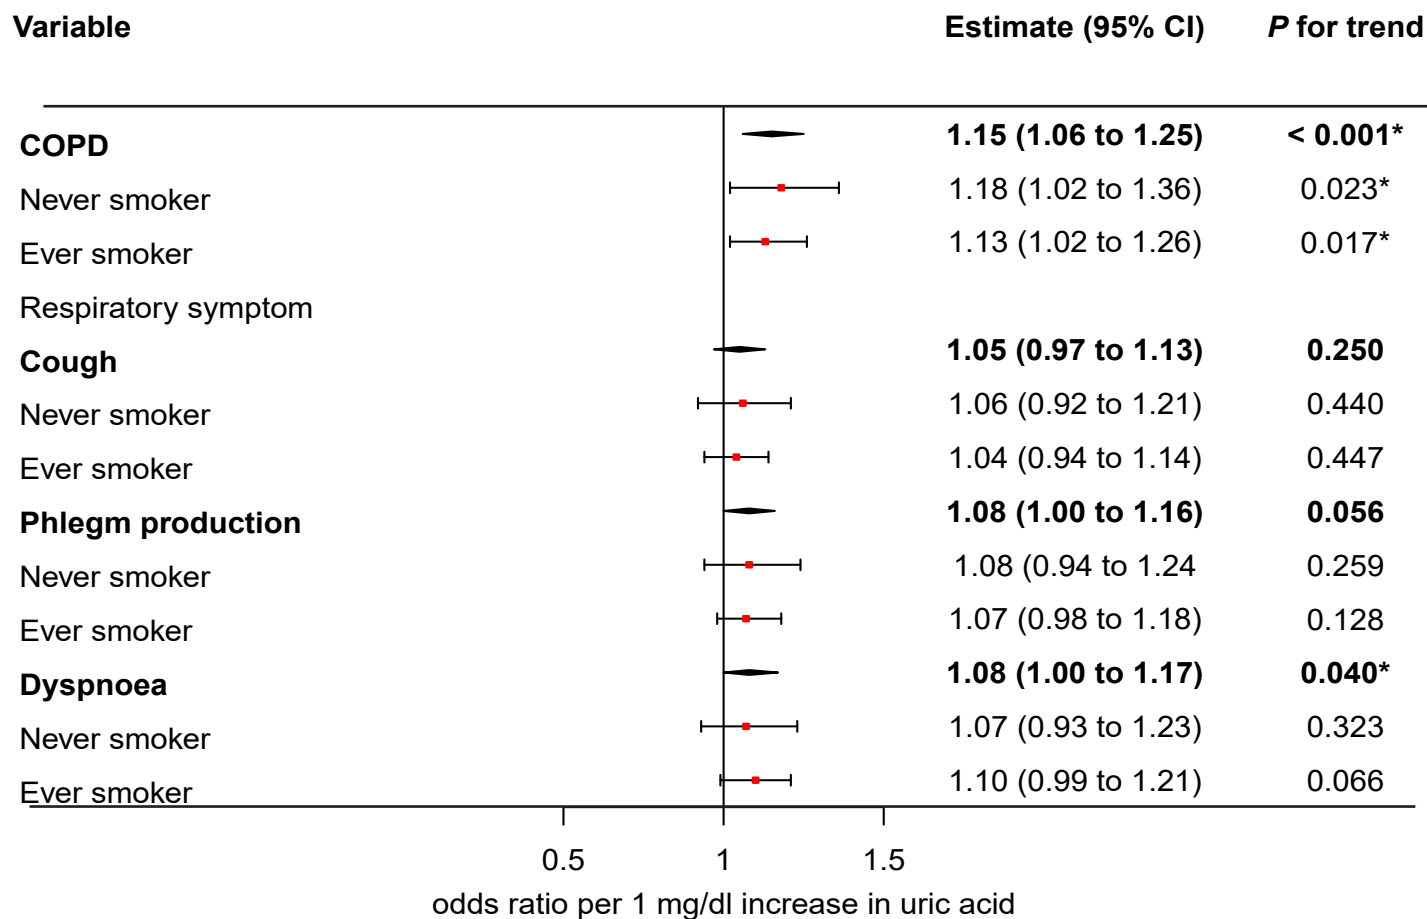

Figure A1

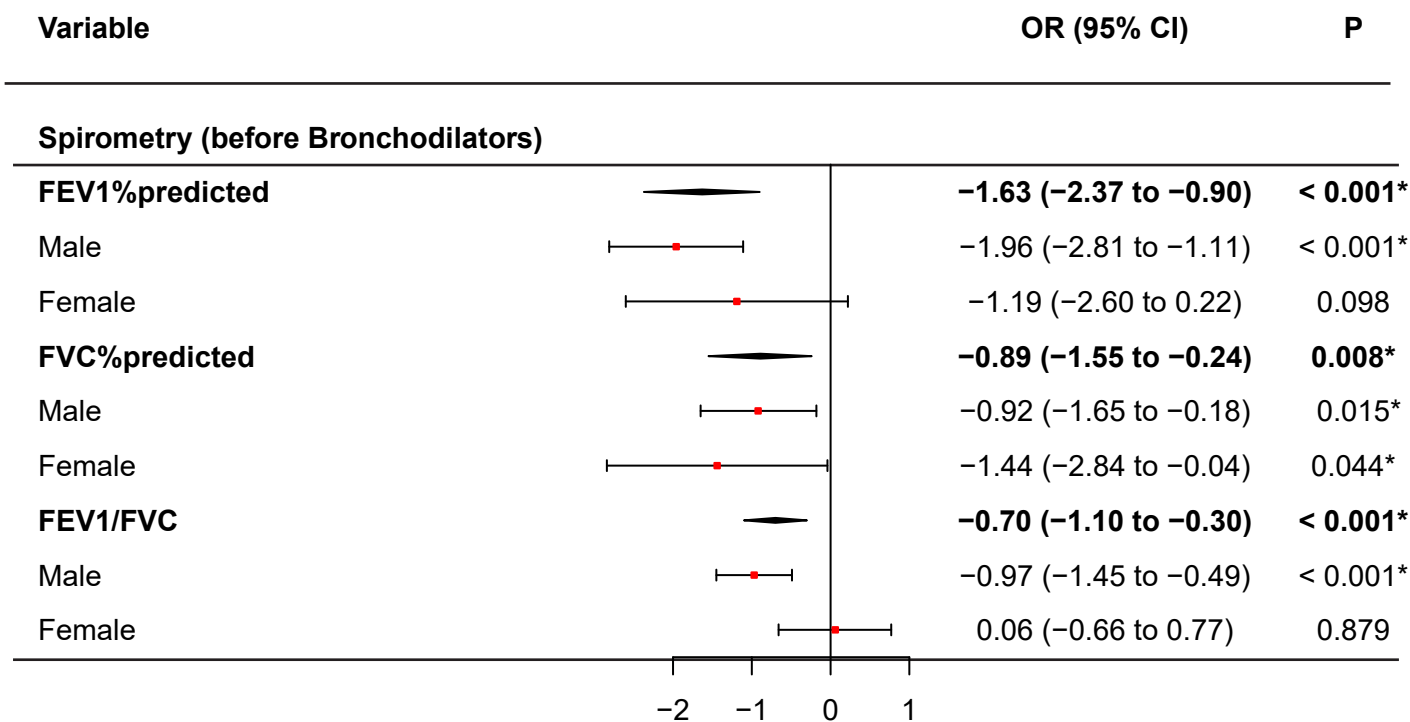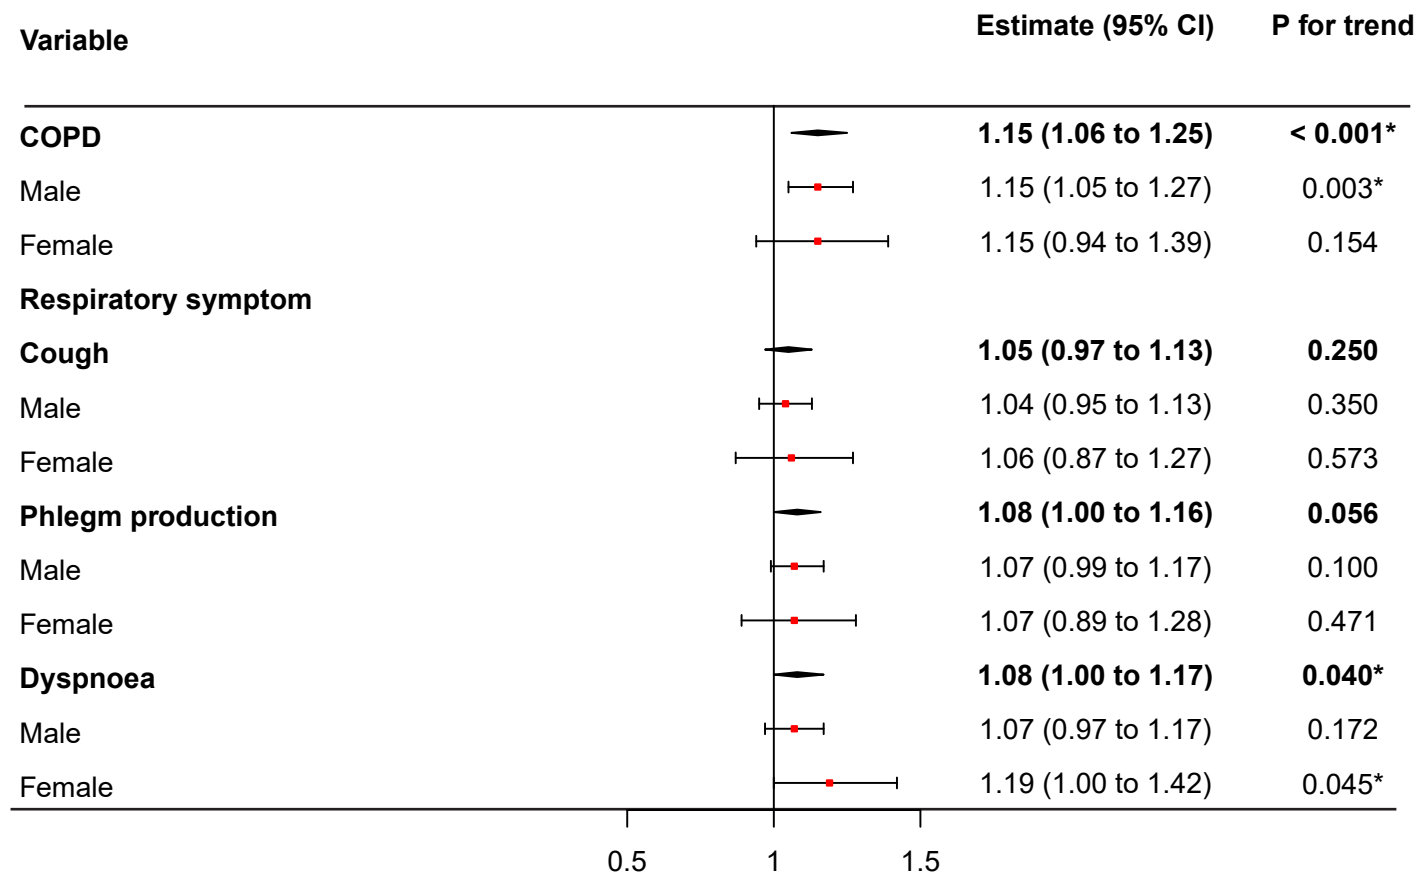

Figure A2

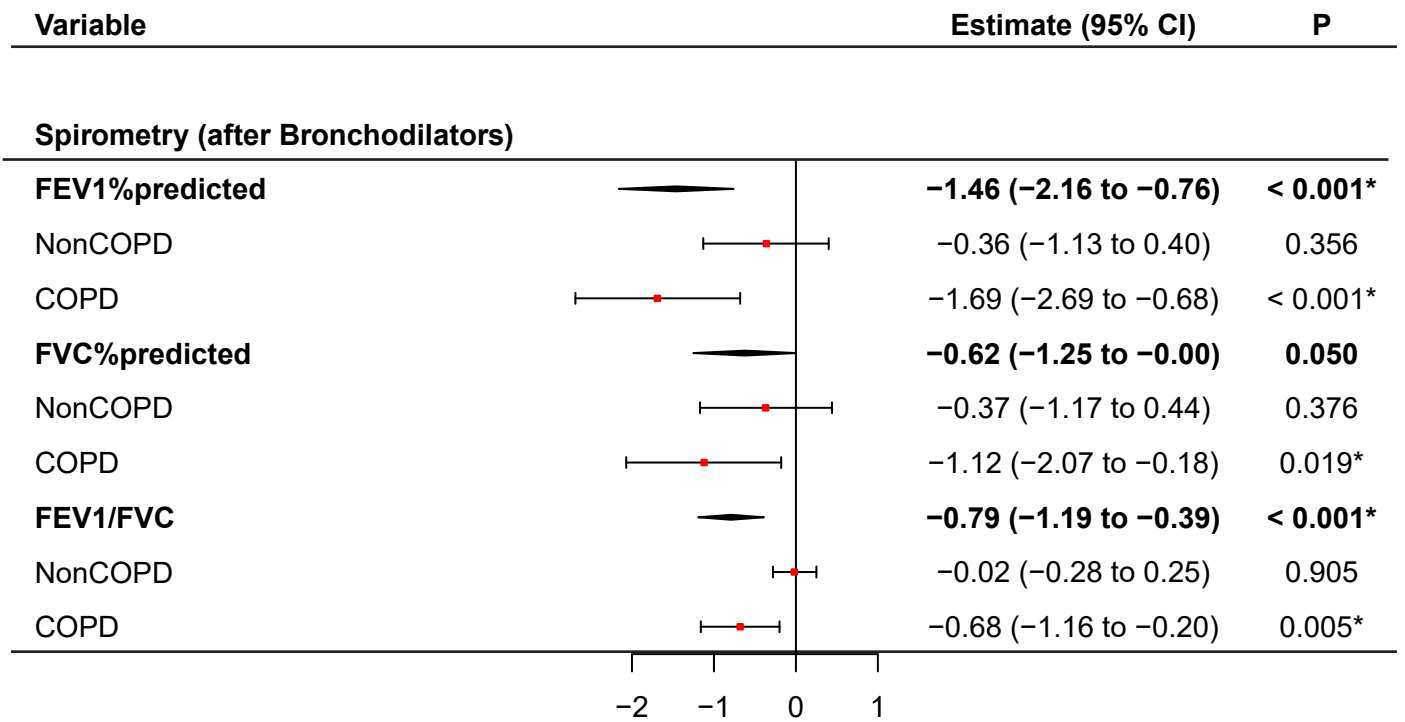

Figure A3

**Figure A1:** Association of SUA with study outcomes stratified by smoking status.

Shown are odds ratio or estimate for each outcome for per 1 mg/dl increase in serum uric acid, adjusted for age, sex, BMI, and cumulative tobacco consumption.

**Abbreviation:** Ever-smokers, former and current smokers combined. COPD, chronic obstructive pulmonary disease; OR, odds risk; 95% CI, 95% confidence interval.

**Bold** values means that all participants were in the analysis.

\* *p* value less than 0.05.

**Figure A2:** Association of SUA with study outcomes stratified by gender. Shown are odds ratio or estimate effect for each outcome for per 1 mg/dl increase in serum uric acid, adjusted for age, BMI, smoking status, and cumulative tobacco consumption.

**Abbreviation:** COPD, chronic obstructive pulmonary disease; FEV1% predicted, percent predicted forced expiratory volume in 1 s; FVC% predicted, percent predicted forced vital capacity; OR, odds risk; 95% CI, 95% confidence interval.

**Bold** values means that all participants were in the analysis.

\* *p* value less than 0.05.

**Figure A3:** Association of SUA with lung function after bronchodilators. Shown are estimates for each outcome for per 1 mg/dl increase in serum uric acid, adjusted for age, BMI, smoking status, and cumulative tobacco consumption.

**Abbreviation:** COPD, chronic obstructive pulmonary disease; Non-COPD, without chronic obstructive pulmonary disease; FEV1% predicted, percent predicted forced expiratory volume in 1 s; FVC% predicted, percent predicted forced vital capacity; OR, odds risk; 95% CI, 95% confidence interval.

**Bold** values means that all participants were in the analysis.

\* *p* value less than 0.05.
